# Supplementary material for: Formation of a Eu(iii) borate solid species from a weak Eu(iii) borate complex in aqueous solution
Source: Royal Society of Chemistry journal article supplement (doi:10.1039/c4dt00843j), 2014-01-01
Supplement: c4dt00843j1.pdf [file c4dt00843j1.pdf]

## Supplementary Information

### **Formation of a Eu(III) borate solid species from a weak Eu(III) borate complex in aqueous solution**

Authors: Juliane Schott<sup>1,2</sup>, Jerome Kretzschmar<sup>1</sup>, Margret Acker<sup>2</sup>, Sascha Eidner<sup>3</sup>, Michael U. Kumke<sup>3</sup>, Björn Drobot<sup>1</sup>, Astrid Barkleit<sup>1,4</sup>, Steffen Taut<sup>2</sup>, Vinzenz Brendler<sup>1</sup>, Thorsten Stumpf<sup>1,4</sup>

Institution: <sup>1</sup> Helmholtz-Zentrum Dresden-Rossendorf (HZDR), Institute of Resource Ecology, 01314 Dresden, Germany

<sup>2</sup> Technische Universität Dresden (TUD), Central Radionuclide Laboratory, 01062 Dresden, Germany

<sup>3</sup> University of Potsdam, Institute of Chemistry (Physical Chemistry), 14476 Potsdam-Golm, Germany

<sup>4</sup> Technische Universität Dresden (TUD), Division of Radiochemistry and Radioecology, 01062 Dresden, Germany

Content:

Fig. S1: Decay curves of the europium luminescence during the formation progress of the Eu(III) borate solid species for a solution containing  $3 \cdot 10^{-5}$  M Eu(III),  $c_{B, total} = 0.7$  M,  $I = 0.1$  M, pH 6

Fig. S2: Progress of the luminescence lifetime  $\tau$  of europium during the Eu(III) borate solid formation for solutions containing  $3 \cdot 10^{-5}$  M Eu(III),  $c_{B, total} = 0.2$  M ... 0.7 M,  $I = 0.1$  M, pH 6

Fig. S3: Powder X-ray diffraction pattern of the solid Eu(III) borate (black graph); X-ray diffraction pattern of the sodium pentaborate phase ( $Na_2[B_5O_8(OH)] \cdot H_2O$ ) described by Menchetti et al.<sup>1</sup> (main diffraction peaks are shown as grey vertical lines)

Fig. S4: Content of different Eu(III) solid species in dependence on the excitation wavelength  $\lambda_{ex}$  determined with the PARAFAC

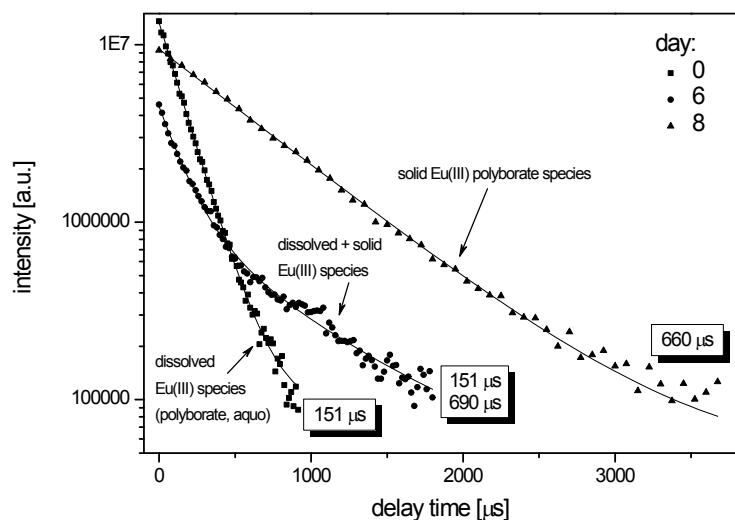

**Fig. S1:** Decay curves of the europium luminescence during the formation progress of the Eu(III) borate solid species for a solution containing  $3 \cdot 10^{-5}$  M Eu(III),  $c_{B, \text{total}} = 0.7$  M,  $I = 0.1$  M, pH 6

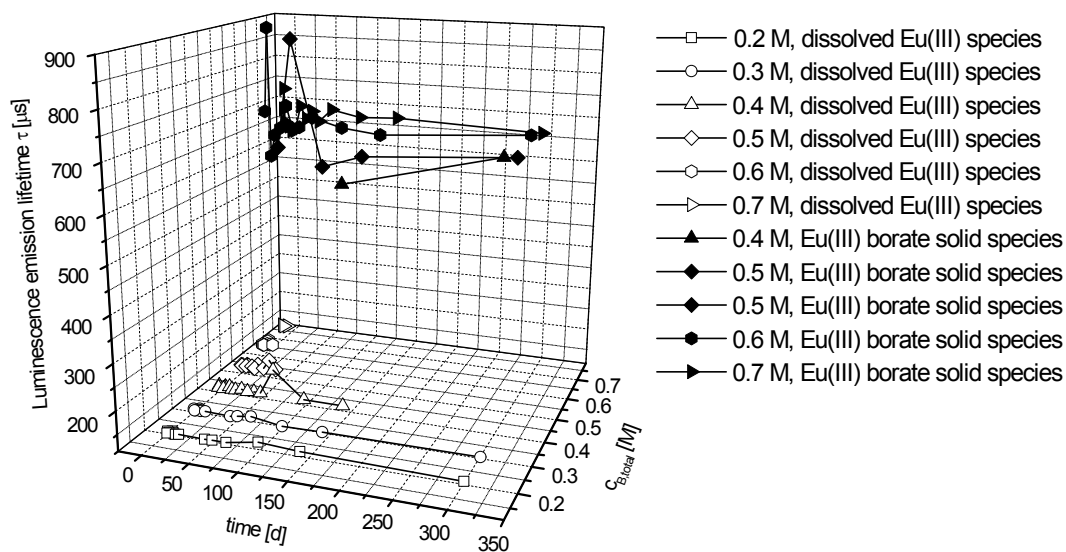

**Fig. S2:** Progress of the luminescence emission lifetime  $\tau$  of europium during the Eu(III) borate solid formation for solutions containing  $3 \cdot 10^{-5}$  M Eu(III),  $c_{B, \text{total}} = 0.2$  M ... 0.7 M,  $I = 0.1$  M, pH 6

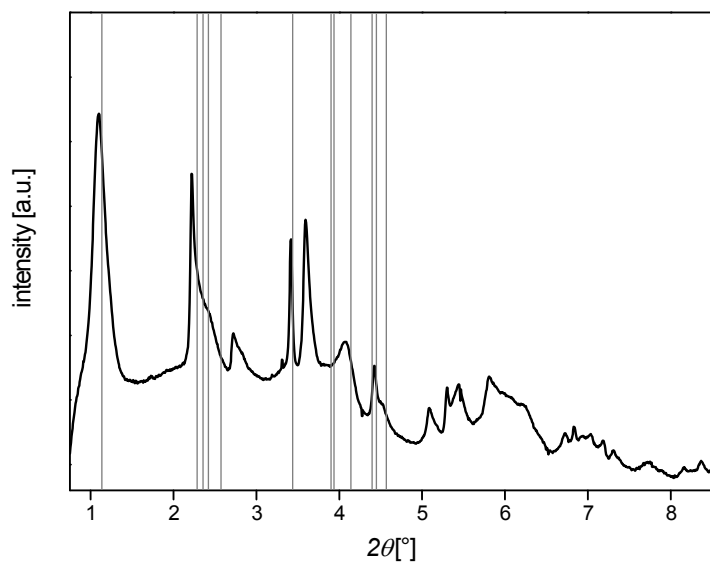

Fig. S3: Powder X-ray diffraction pattern of the solid Eu(III) borate (black graph); X-ray diffraction pattern of the sodium pentaborate phase ( $\text{Na}_2[\text{B}_5\text{O}_8(\text{OH})]\cdot\text{H}_2\text{O}$ ) described by Menchetti et al.<sup>i</sup> (main diffraction peaks are shown as grey vertical lines)

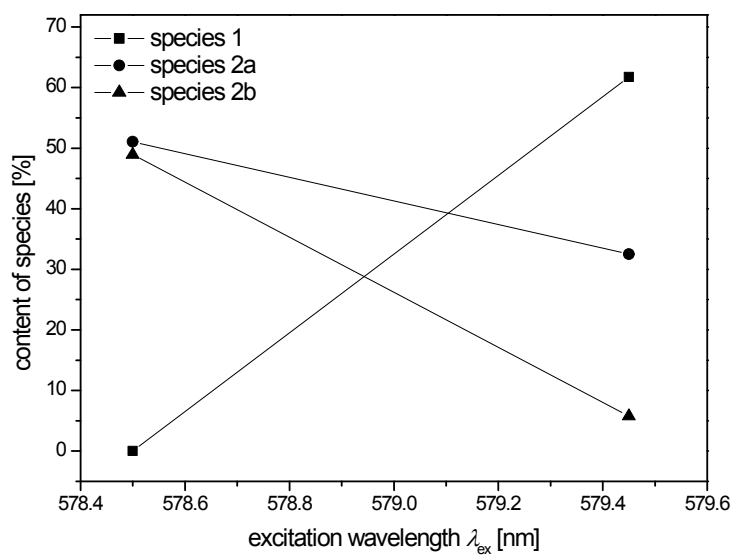

Fig. S4: Content of different Eu(III) solid species in dependence on the excitation wavelength  $\lambda_{\text{ex}}$  determined with the PARAFAC

<sup>i</sup> S. Menchetti, C. Sabelli, A. Stoppioni, and R. Trosti-Ferroni, *Neues Jahrb. Mineral. Abh.*, 1983, **148**, 163–180.
